# Supplementary material for: Mechanistic Insights into the Protection Effect of Argonaute–RNA Complex on the HCV Genome
Source: MDPI journal article supplement (doi:10.3390/biom12111631), 2022-11-03
Supplement: s1 [file s1]

## Supporting Information

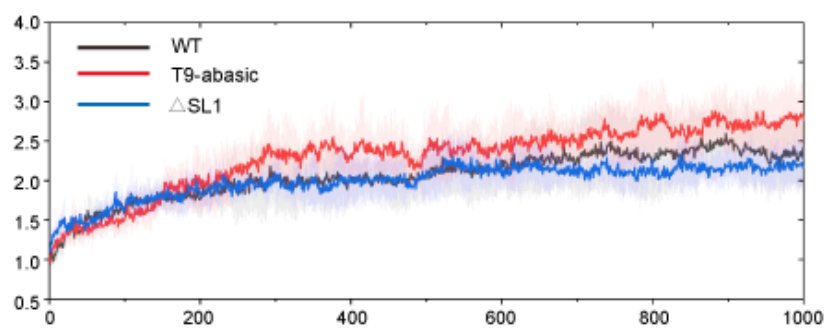

**Figure S1.** Time evolution of the root-mean-square deviation (RMSD) of Ago2 backbone atoms with respect to the initial structure

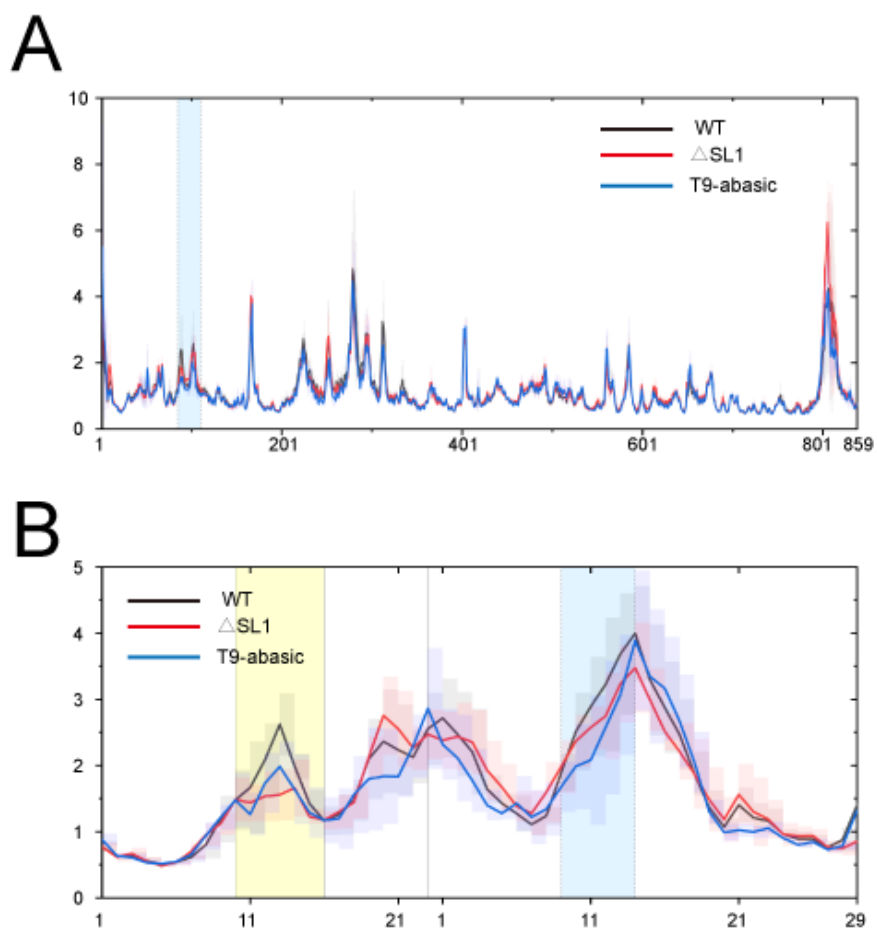

**Figure S2.** (A) Root-mean-square fluctuations (RMSF) of Ago2 C $\alpha$  atoms averaged over 5 independent runs in the three systems. The significant fluctuation differences are marked with blue backgrounds. (B) RMSF of RNA P atoms averaged over 5 independent runs in the three systems. The significant fluctuation differences are marked with yellow and blue (represents the SL1 region) backgrounds.

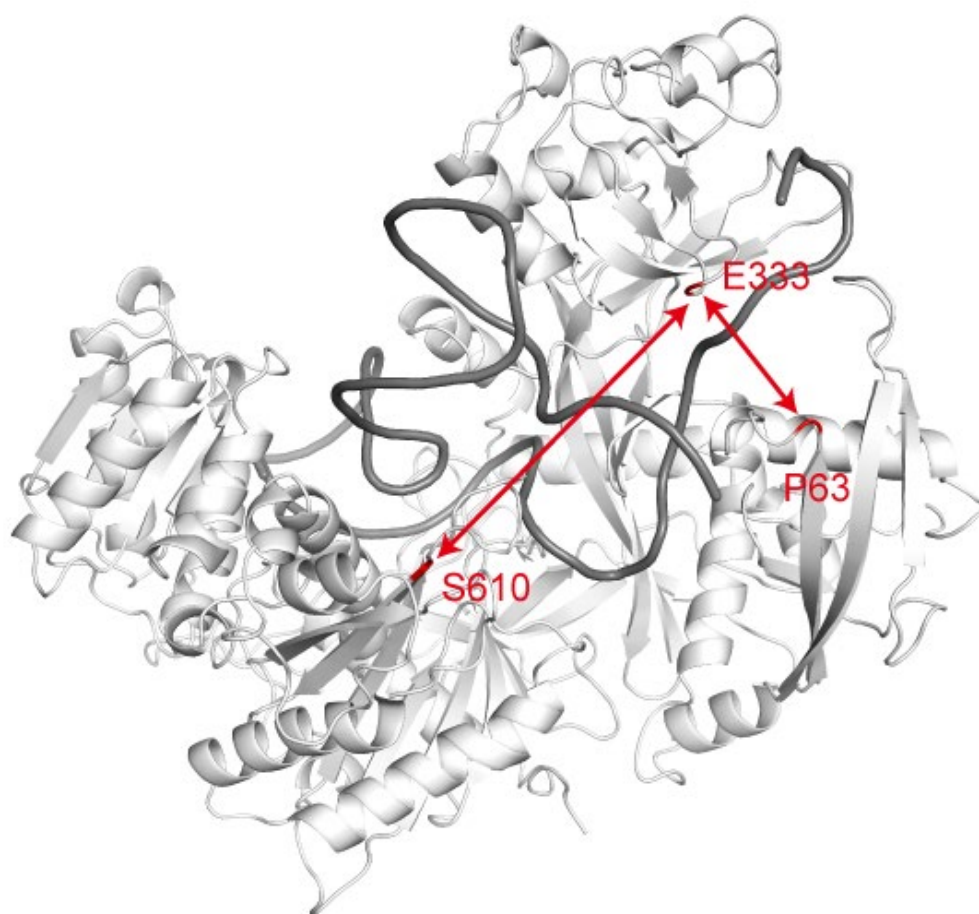

**Figure S3.**  $d_{E333-V610}$  represents the distance between the PAZ and PIWI domains while  $d_{E333-P63}$  represents the distance between PAZ and N domains.

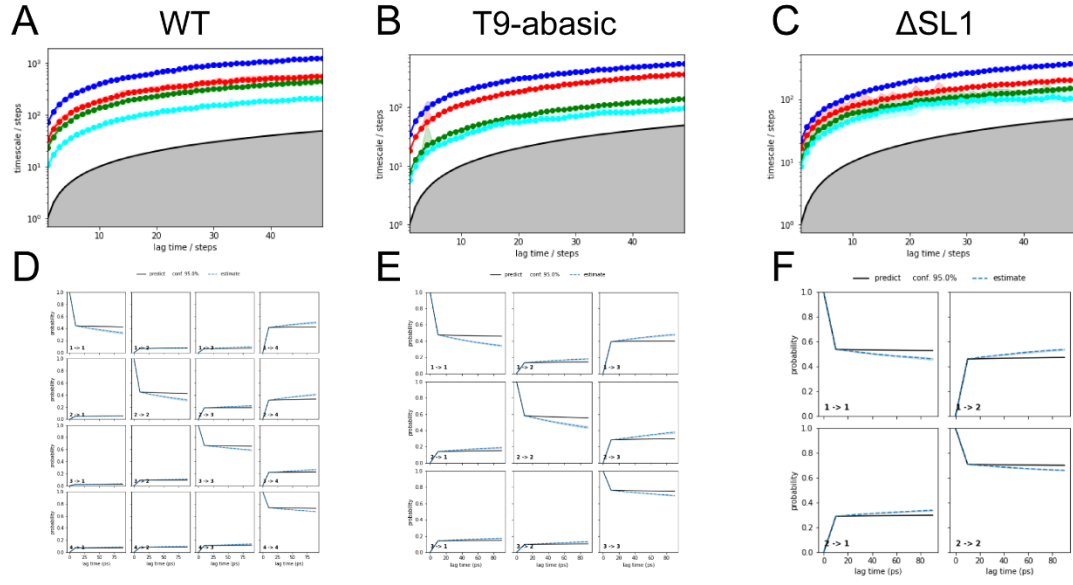

**Figure S4.** The MSM timescale test in the WT system (A), the T9-abasic system (B) and the  $\Delta$ SL1 system (C). The MSM Chapman–Kolmogorov test in the WT system (D), the T9-abasic system (E) and the  $\Delta$ SL1 system (F).

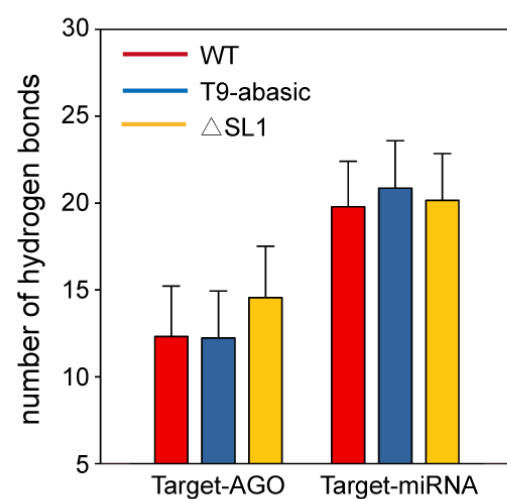

**Figure S5.** The number of hydrogen bonds of the target RNA with the Ago2 protein and miRNA.
